# Supplementary material for: [FeIII(dmbpy)(CN)4]−: a new building block for designing single-chain magnets
Source: Royal Society of Chemistry journal article supplement (doi:10.1039/c2dt31675g), 2012-01-01
Supplement: c2dt31675g.pdf [file c2dt31675g.pdf]

## Supplementary Information

# $[\text{Fe}^{\text{III}}(\text{dmphy})(\text{CN})_4]^-$ : a new building block for designing single-chain magnets

Luminita Marilena Toma, Jorge Pasán, Catalina Ruiz-Pérez, Francesc Lloret, and Miguel Julve

**Table S1.** Selected ac magnetic data for **5**

| $T / \text{K}$ | $\chi_{\text{T(A)}} / \chi_{\text{T(B)}}^{\text{a}}$ | $\chi_{\text{S(A)}} / \chi_{\text{S(B)}}^{\text{b}}$ | $\alpha_{\text{(A)}} / \alpha_{\text{(B)}}^{\text{c}}$ | $-\log \tau_{\text{(A)}} / -\log \tau_{\text{(B)}}^{\text{d}}$ |
|----------------|------------------------------------------------------|------------------------------------------------------|--------------------------------------------------------|----------------------------------------------------------------|
| 2.0            | 2.08 / 11.82                                         | 0.08 / 0.90                                          | 0.445 / 0.641                                          | 2.26 / ----                                                    |
| 2.3            | 2.88 / 13.50                                         | 0.05 / 1.20                                          | 0.423 / 0.621                                          | 2.98 / -----                                                   |
| 2.5            | 3.72 / 12.00                                         | 0.01 / 2.00                                          | 0.422 / 0.530                                          | 3.34 / 0.23                                                    |
| 2.7            | 6.00 / 17.10                                         | 0.00 / 3.00                                          | 0.420 / 0.490                                          | 3.70 / 0.88                                                    |
| 3.0            | 5.50 / 13.70                                         | 0.00 / 3.60                                          | 0.325 / 0.440                                          | ----- / 1.80                                                   |
| 3.3            | ----- / 19.00                                        | ----- / 6.50                                         | ----- / 0.386                                          | ----- / 2.80                                                   |

(a) Isothermal and (b) adiabatic susceptibilities and (c) Cole-Cole parameter in the following equation:

$$\chi''(\omega) = \frac{\chi_T - \chi_S}{2 \tan[(1 + \alpha)\pi/2]} + \left\{ (\chi' - \chi_S)(\chi_T - \chi') + \frac{(\chi_T - \chi_S)^2}{4 \tan^2[(1 + \alpha)\pi/2]} \right\}^{1/2}$$

(d)  $\tau$  is the relaxation time at each temperature from this Table.

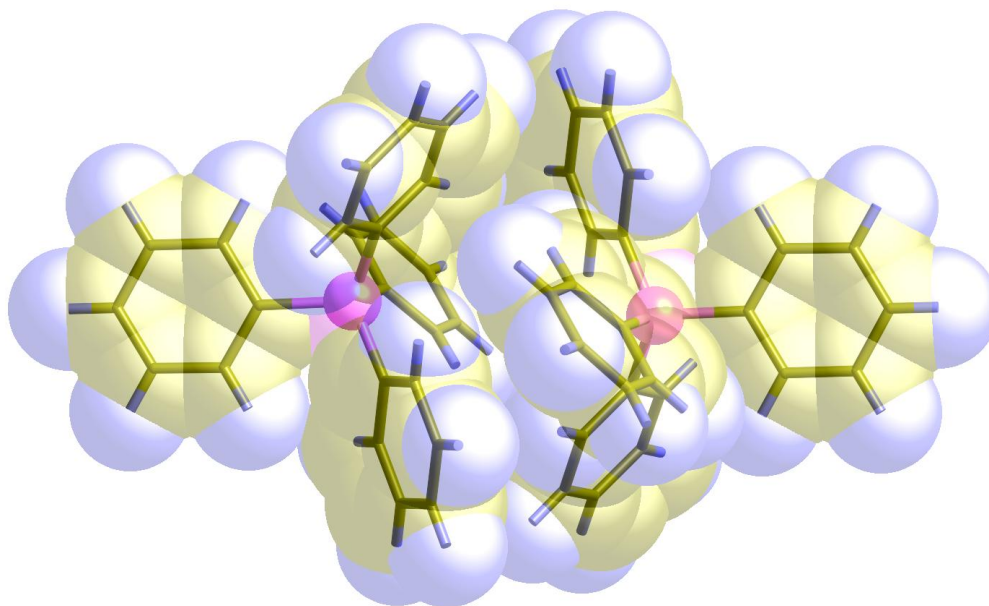

**Figure S1.** Sextuple phenyl embrace (SPE) interaction involving the PPh<sub>4</sub><sup>+</sup> cations in **1**.

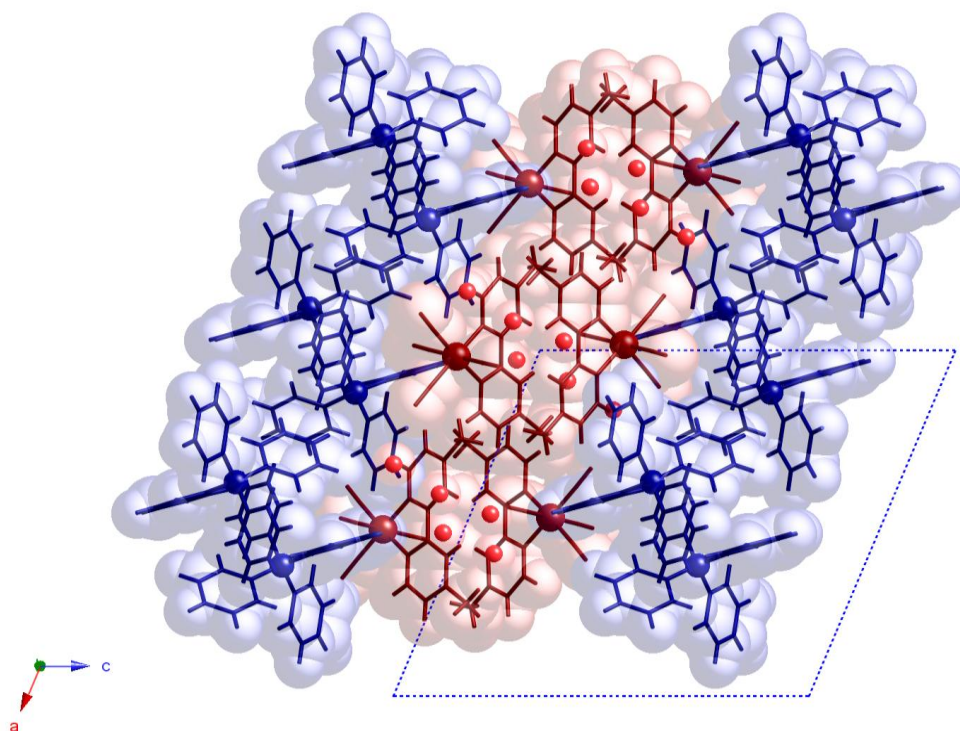

**Figure S2.** View in the *ac* plan of the double alternative packing of the  $\text{PPh}_4^+$  cations and  $[\text{Fe}(\text{dmbipy})(\text{CN})_4]^-$  anions in **1**.

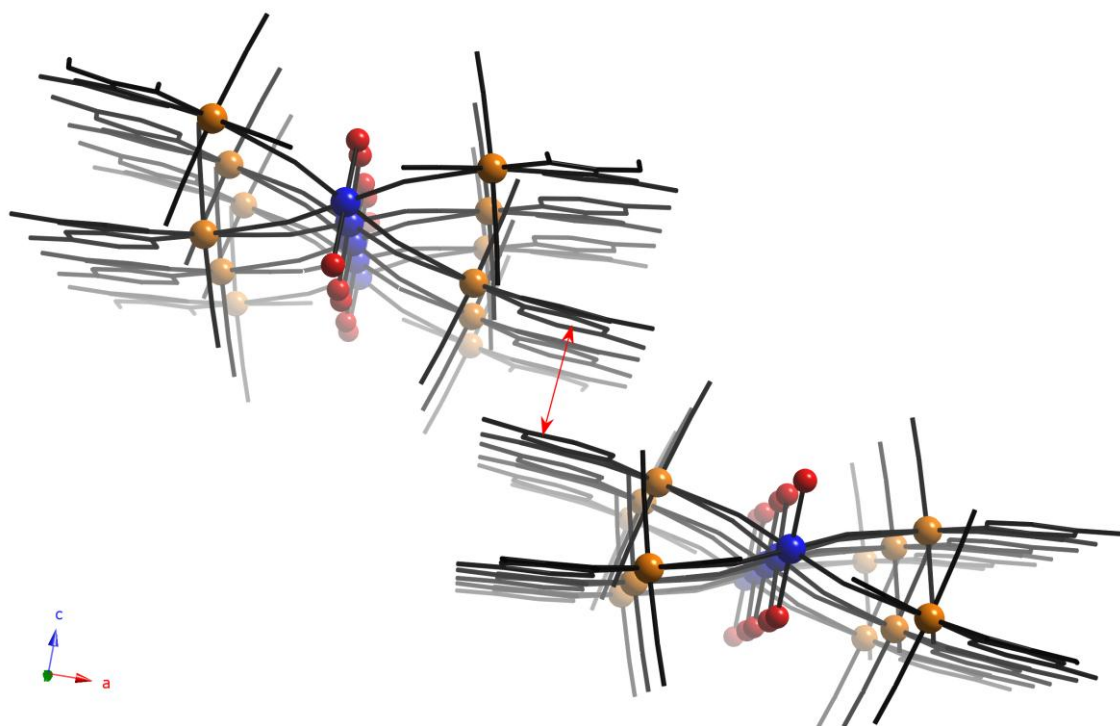

**Figure S3.** View of two neighbouring chains along the crystallographic *b* axis showing the shortest  $\pi$ - $\pi$  interactions between the quasi-eclipsed dmbpy ligands.

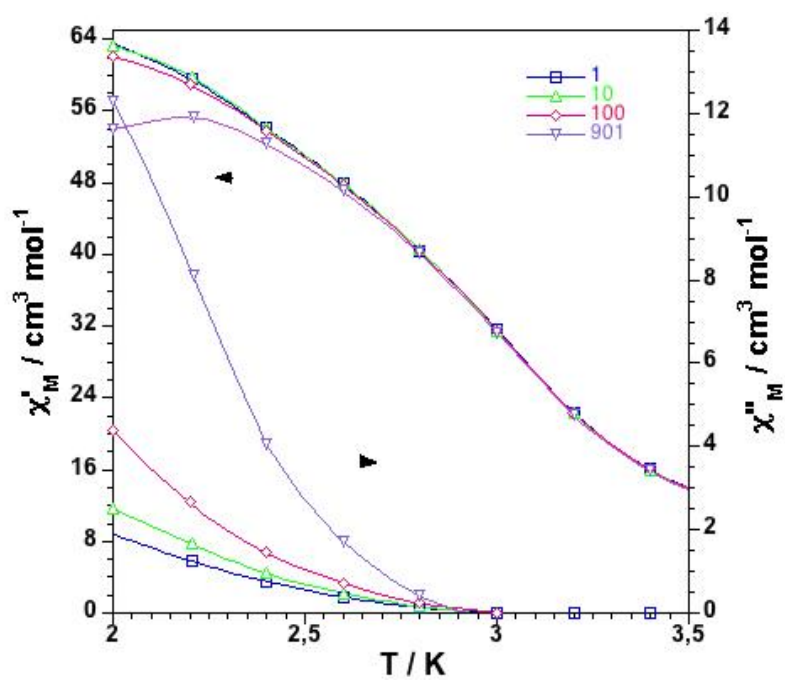

**Figure S4.** Temperature dependence of the *ac* susceptibility for **3** measured at several frequencies (1–901 Hz), where  $\chi_M'$  and  $\chi_M''$  are in-phase and out-of-phase susceptibilities, respectively. The solid lines are eye-guides.

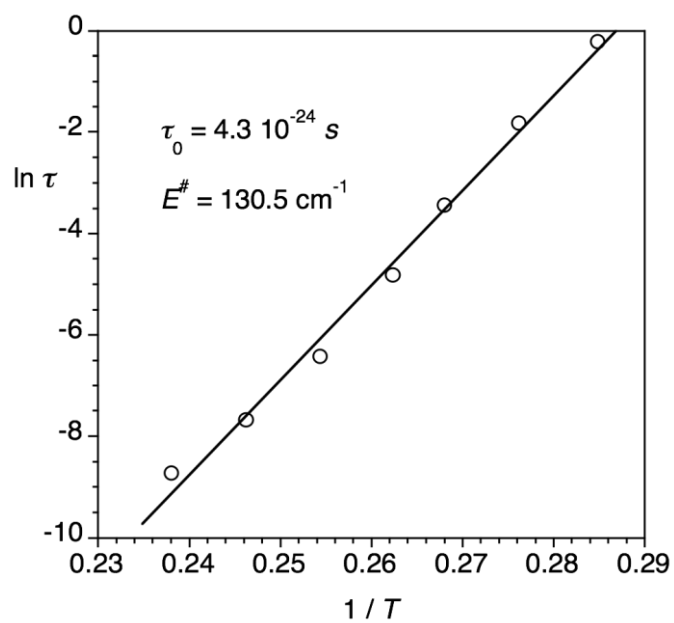

**Figure S5.** Arrhenius plot for **5**: (○) experimental data from de *ac* susceptibility (Figure 9); (—) least-squares fit to the Arrhenius law.

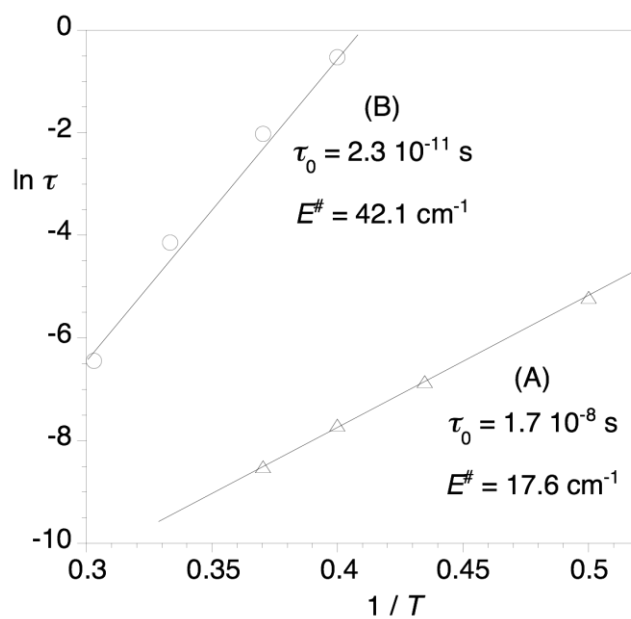

**Figure S6.** Arrhenius plots for **5**: (○) and (△): experimental data extracted from the Cole-Cole plots (Fig. 10) corresponding to the two different relaxation processes noted A and B (see text).
